# Supplementary material for: Robust hydrophobic veova10-based colloidal photonic crystals towards fluorescence enhancement of quantum dots
Source: Royal Society of Chemistry journal article supplement (doi:10.1039/d0nr04676k), 2020-01-01
Supplement: d0nr04676k1.pdf [file d0nr04676k1.pdf]

## **Robust Hydrophobic Veova10-Based Colloidal Photonic Crystals towards Fluorescence Enhancement of Quantum Dots**

Xiao-Qing Yu, Zhijie Zhu, Xingjiang Wu, Ge Li, Rui Cheng, Ren-Kun Qing, Qing Li\*, Su Chen\*

State Key Laboratory of Materials-Oriented Chemical Engineering, College of Chemical  
Engineering, Jiangsu Key Laboratory of Fine Chemicals and Functional Polymer Materials,  
Nanjing Tech University, No. 5 Xin Mofan Road, Nanjing 210009, P. R. China.

Corresponding Authors: E-mail: [chensu@njtech.edu.cn](mailto:chensu@njtech.edu.cn); [liqing1128@njtech.edu.cn](mailto:liqing1128@njtech.edu.cn)

## Supplementary Figures

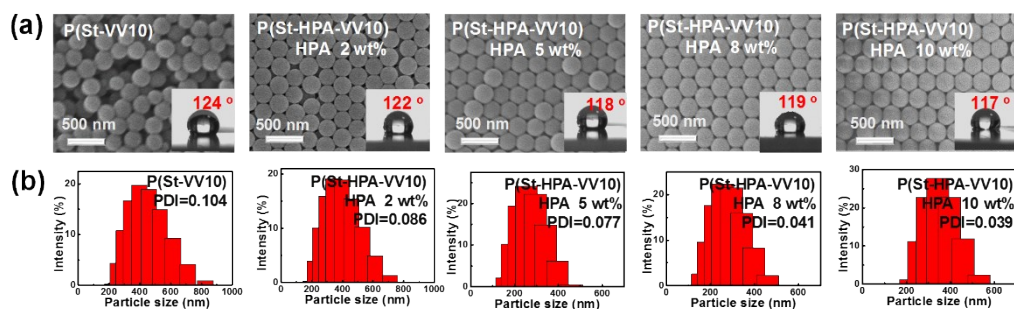

**Fig. S1** (a) SEM images and (b) hydrodynamic diameter distributions of P(St-VV10) and P(St-HPA-VV10) colloidal particles with different HPA monomer concentration (0, 2, 5, 8, 10 wt%). Insets: static contact angle of the corresponding film.

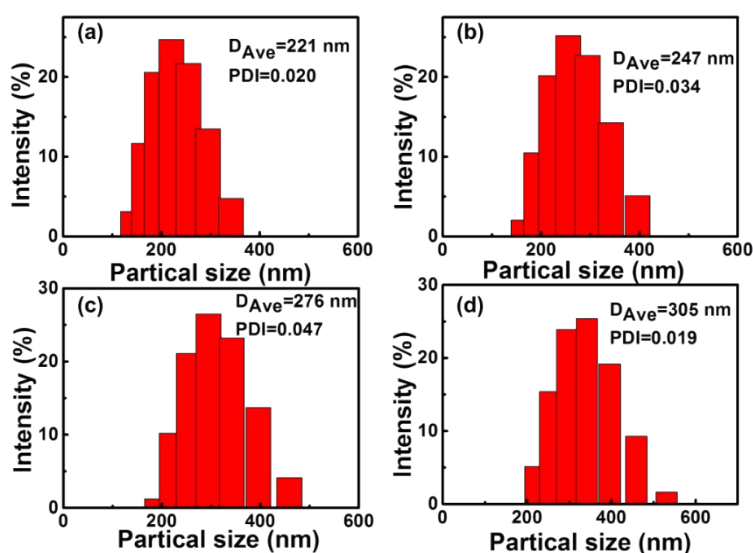

**Fig. S2** Hydrodynamic diameter distribution of P(St-HPA-VV10) colloidal particles of (a) 221, (b) 247, (c) 276 and (d) 305 nm.

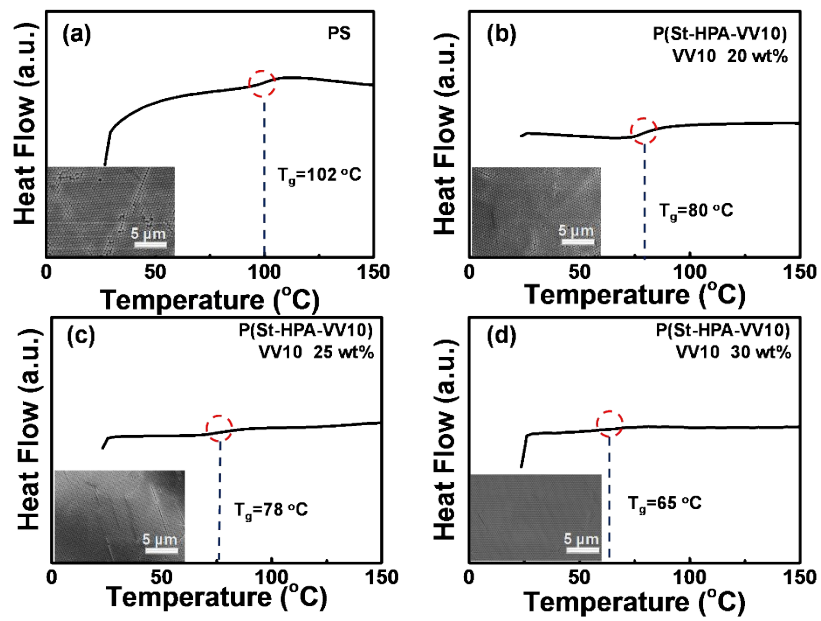

**Fig. S3** DSC curves and SEM images of (a) pure PS and P(St-HPA-VV10) colloidal particles with VV10 monomer concentration of (b) 20 wt%, (c) 25 wt% and (d) 30 wt%.

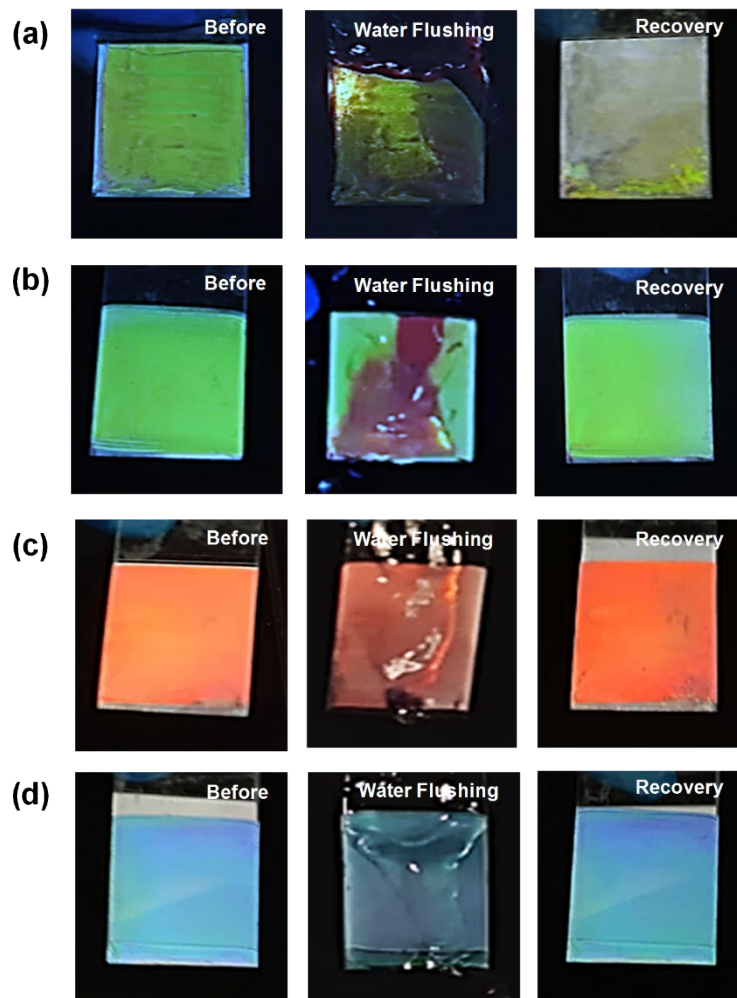

**Fig. S4** Digital photographs of (a) pure PS CPCs film and P(St-HPA-VV10) CPCs film with VV10 monomer concentration of (b) 20 wt%, (c) 25 wt% and (d) 30 wt%.

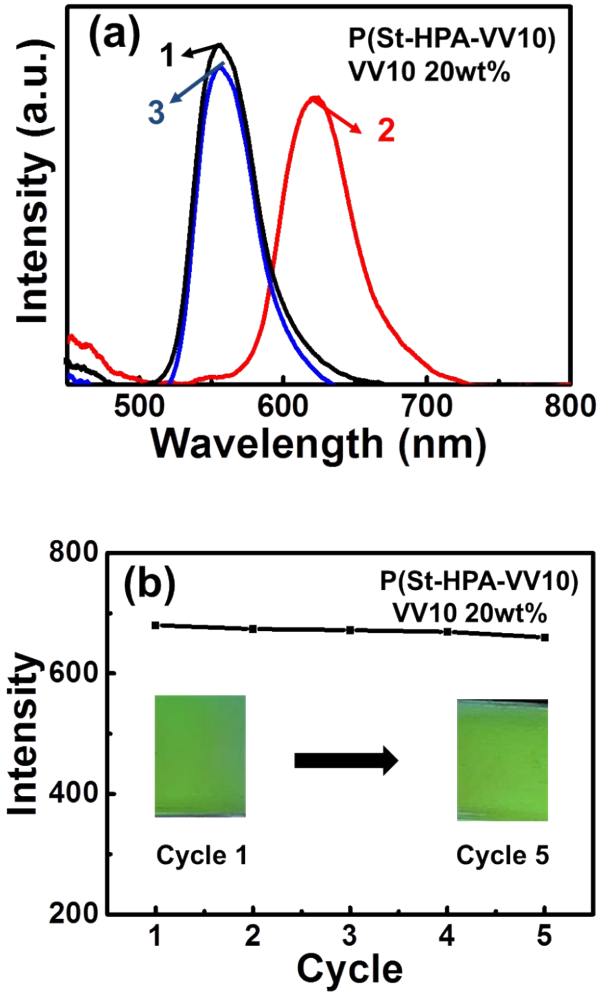

**Fig. S5** (a) Reflection spectra of P(St-HPA-VV10) CPCs film (VV10, 20 wt%) before rinsing (black curve), after rinsing (red curve) and recovery (blue curve). (b) Reflection intensity and digital photographs of P(St-HPA-VV10) CPCs film (VV10, 20 wt%) for five water flushing treatment cycles.

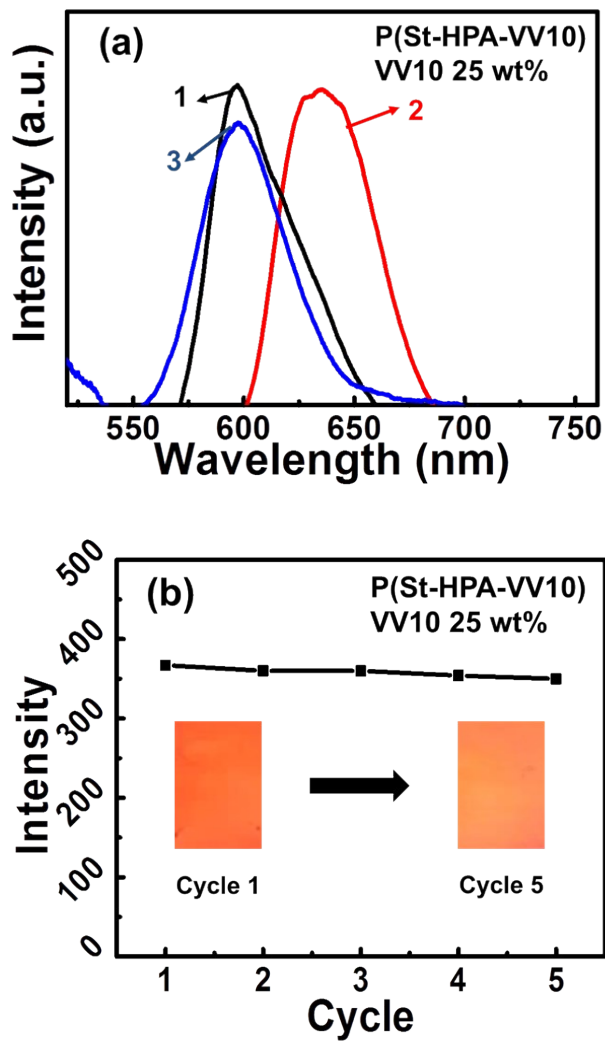

**Fig. S6** (a) Reflection spectra of P(St-HPA-VV10) CPCs film (VV10, 25 wt%) before rinsing (black curve), after rinsing (red curve) and recovery (blue curve). (b) Reflection intensity and digital photographs of P(St-HPA-VV10) CPCs film (VV10, 25 wt%) for five water flushing treatment cycles.

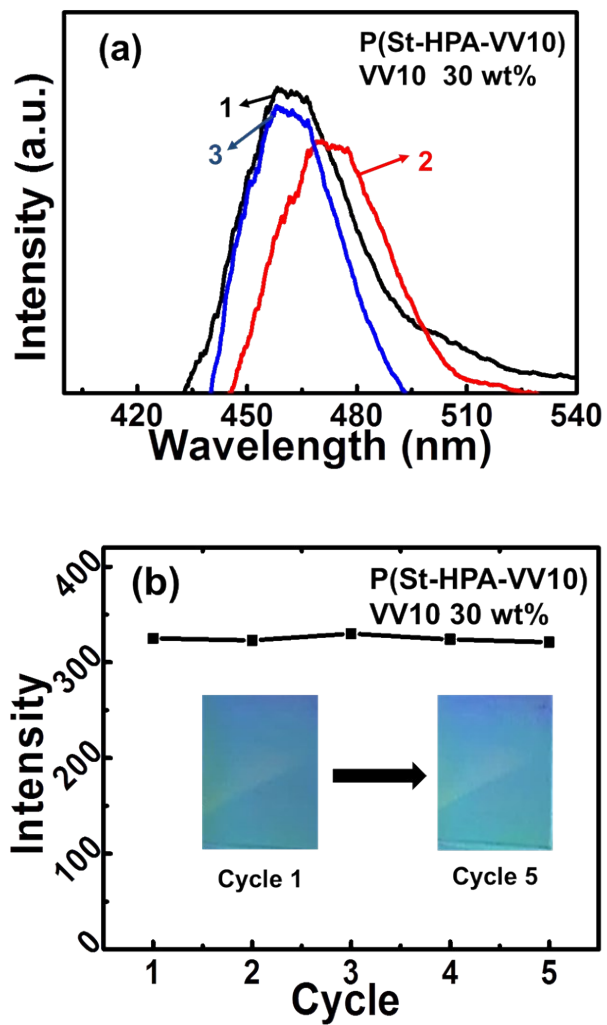

**Fig. S7** (a) Reflection spectra of P(St-HPA-VV10) CPCs film (VV10, 30 wt%) before rinsing (black curve), after rinsing (red curve) and recovery (blue curve). (b) Reflection intensity and digital photographs of P(St-HPA-VV10) CPCs film (VV10, 30 wt%) for five water flushing treatment cycles.

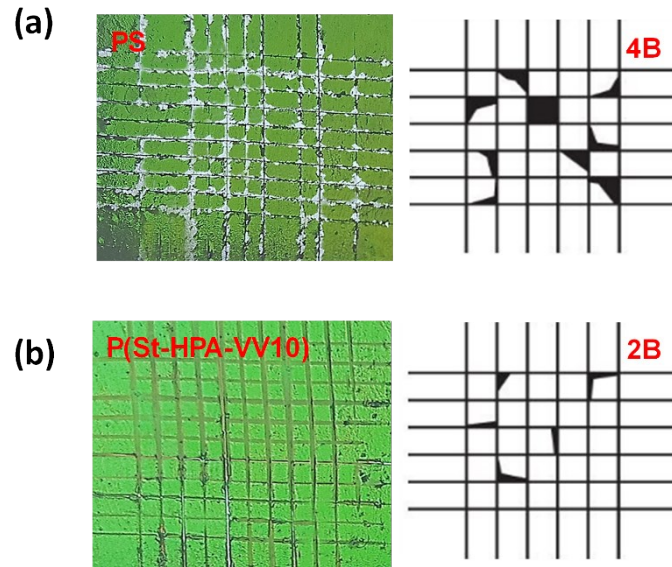

**Fig. S8** Adhesion degree of (a) pure PS and (b) P(St-HPA-VV10) CPCs coating determined by scribe test.

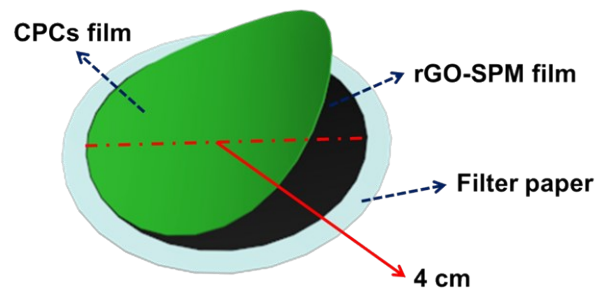

**Fig. S9** Schematic illustration of rGO-SPM/P(St-HPA-VV10) CPCs film with angle-independent structural color.



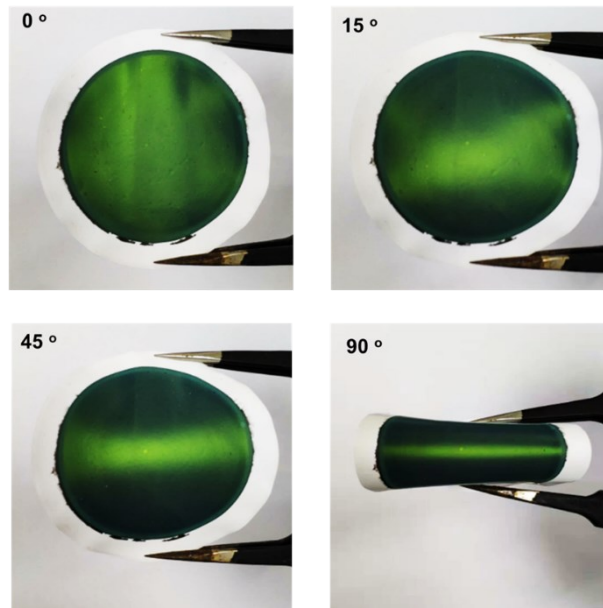

**Fig. S10** Optical photographs of rGO-SPM/P(St-HPA-VV10) CPCs film at different bending angles of  $0^\circ$ ,  $15^\circ$ ,  $45^\circ$  and  $90^\circ$  (reflection peak centred at 545 nm).

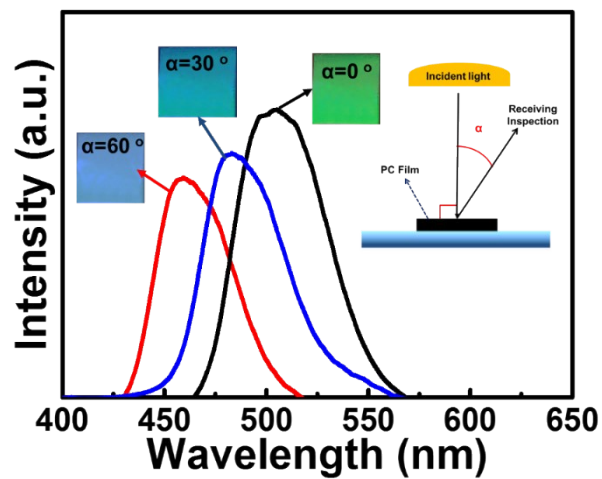

**Fig. S11** Reflection spectra of angle-dependent P(St-HPA-VV10) CPCs film from different angle.

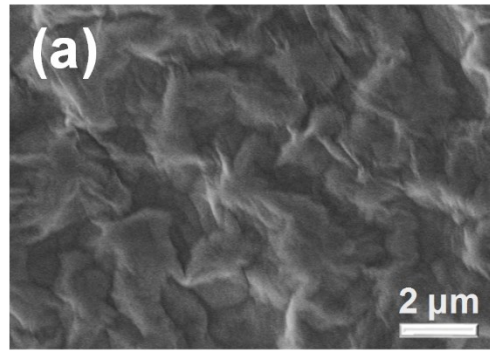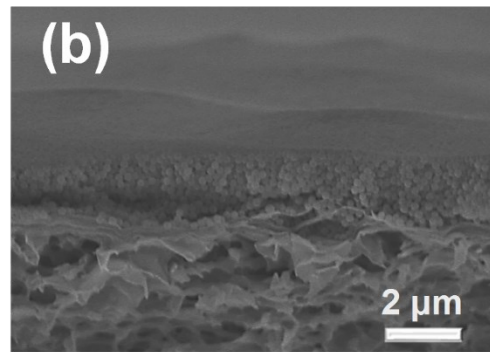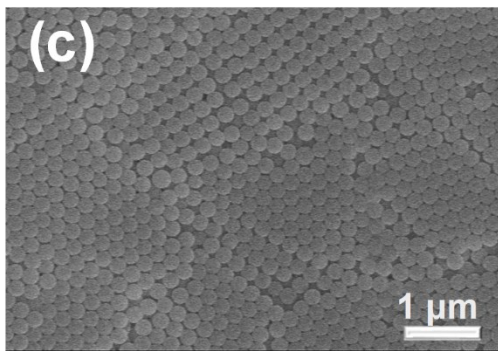

**Fig. S12** SEM images of the surface of (a) rGO-SPM film, (b) cross-section of rGO-SPM/P(St-HPA-VV10) CPCs film and (c) surface of P(St-HPA-VV10) CPCs film.

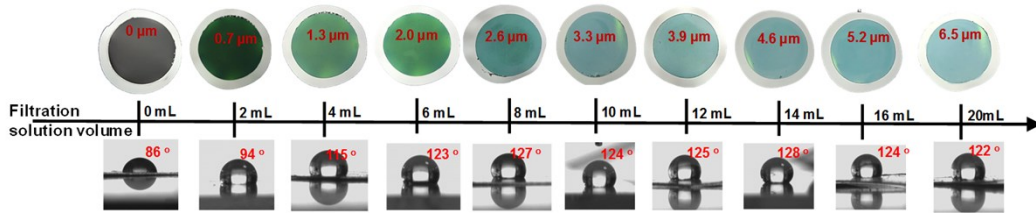

**Fig. S13** Optical photographs of rGO-SPM/P(St-HPA-VV10) CPCs films with different CPCs thickness and corresponding static contact angles.

Theoretical film thickness calculation formula:

$$H_{film} = \omega \cdot V_{latex} / S_{film}$$

Where  $H_{film}$  is the thickness of P(St-HPA-VV10) CPCs film,  $\omega$  is the solid content of P(St-HPA-VV10) colloidal latex (here it is constant of 0.4 wt%),  $V_{latex}$  is filtration solution volume,  $S_{film}$  is the area of P(St-HPA-VV10) CPCs film (a constant of 12.56  $\text{cm}^2$ ).

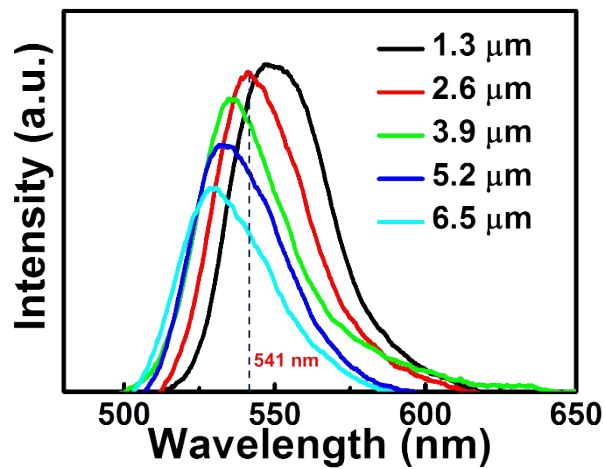

**Fig. S14** Reflection spectra of CPCs films with different film thicknesses of 1.3  $\mu\text{m}$  (black curve), 2.6  $\mu\text{m}$  (red curve), 3.9  $\mu\text{m}$  (green curve), 5.2  $\mu\text{m}$  (blue curve) and 6.5  $\mu\text{m}$  (azure curve).

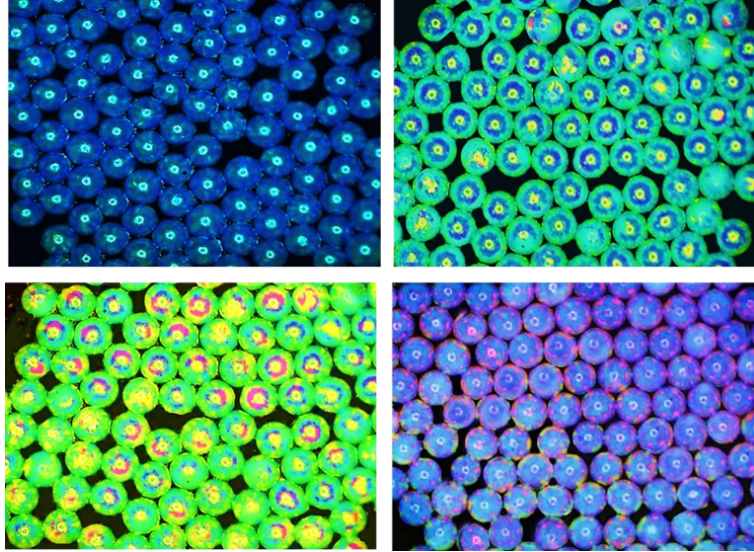

**Fig. S15** Optical microscopy images of CPCs supraballs with reflection peak centred at 457 nm, 557 nm, 580 nm and 640 nm, respectively.

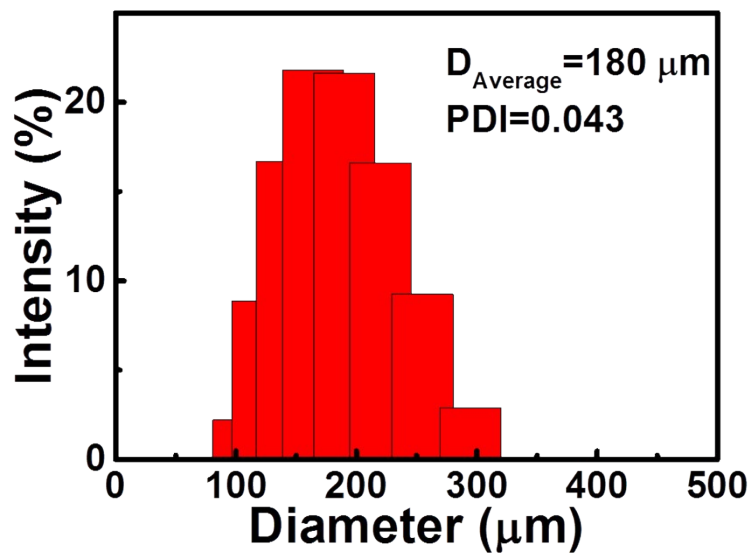

**Fig. S16** Normalized size distribution of CPCs supraballs.

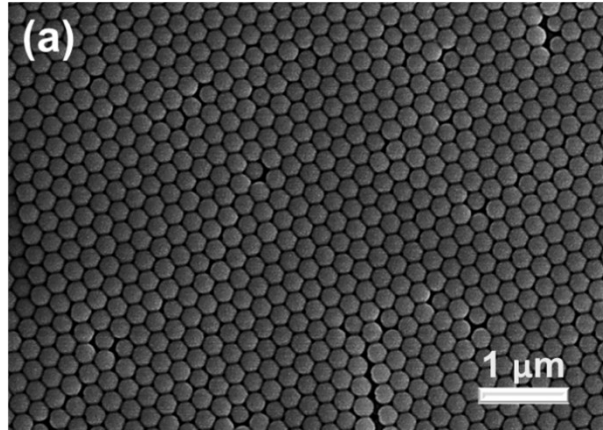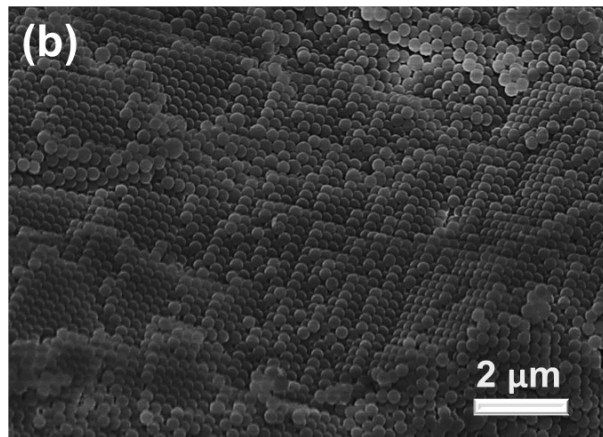

**Fig. S17** SEM images of (a) the surface and (b) cross-section of the CPCs supraballs with blue structural color.

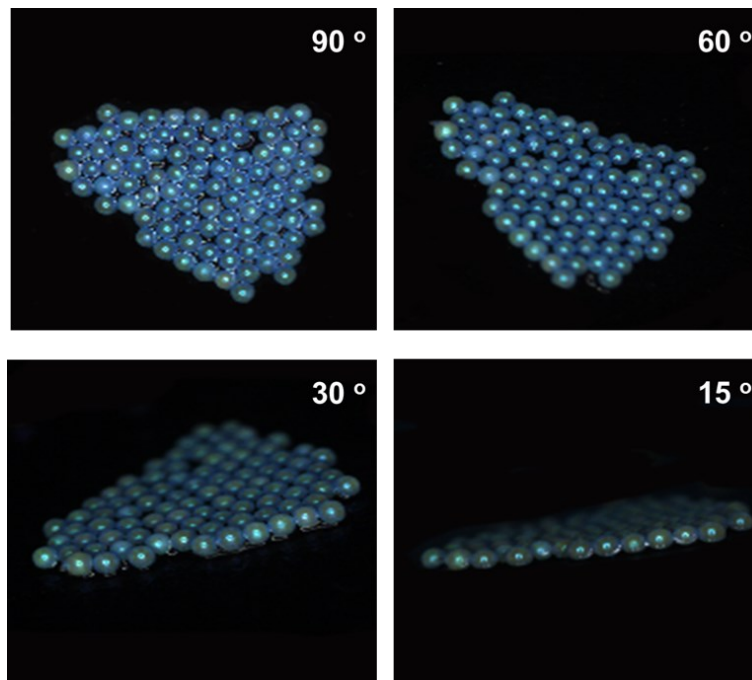

**Fig. S18** Optical microscopy images of CPCs supraballs viewed at different angles.
